# Supplementary material
Source: publisher figshare collection journal article supplement (https://rs.figshare.com/ndownloader/files/20046035)
Supplement: Supplementary file 1 [file 20046035]

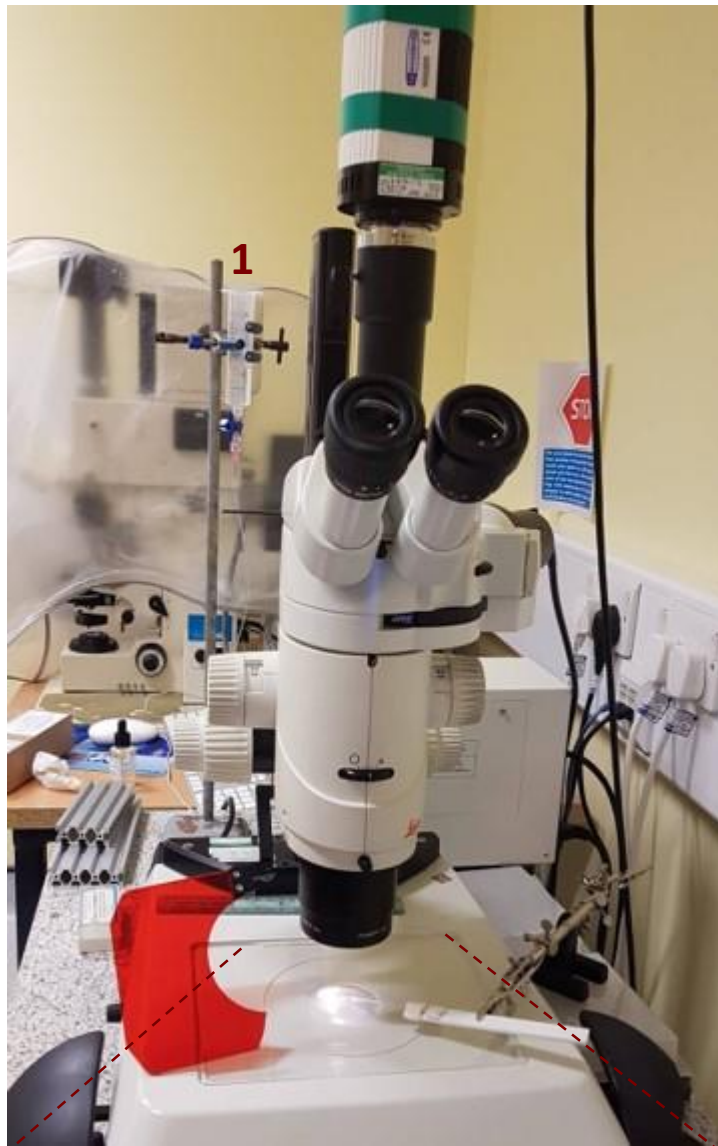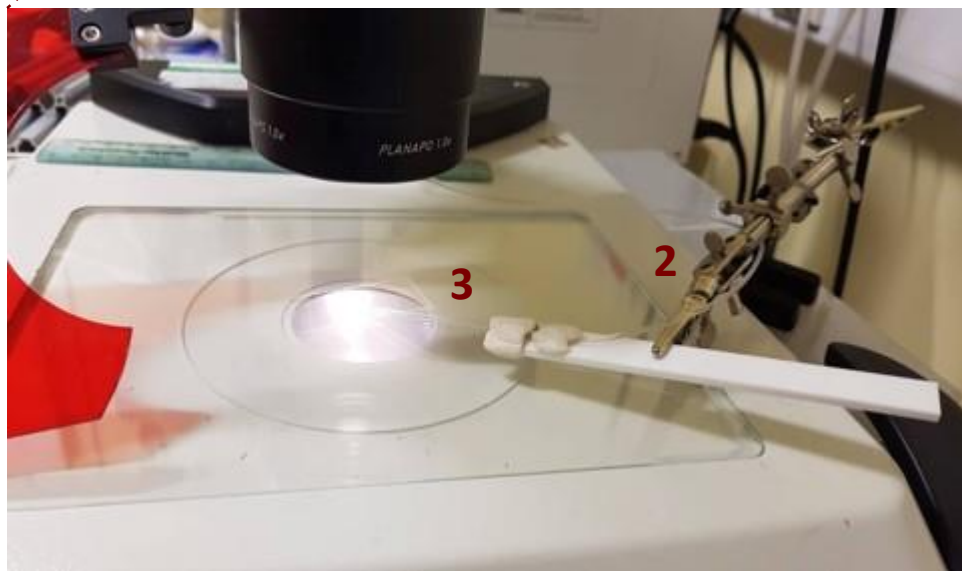

**Fig. S1. A. Micro-stimulation apparatus and set-up.** Picture of the whole apparatus set up **B. Glass needle set-up.** Picture of the zoomed in section where showing the glass needle.
